# Supplementary material for: Therapeutic and Prognostic Implications of Immune-Related Adverse Events in Advanced Non-Small-Cell Lung Cancer
Source: PubMed Central journal article supplement (PMC8277237; doi:10.3389/fonc.2021.703893), 2021-06-29
Supplement: DataSheet_1.pdf [file DataSheet_1.pdf]

## *Supplementary Material*

**Supplementary Table 1: Characteristics of stage III non-small cell lung cancer patients who received durvalumab after definitive chemoradiation**

| <b><u>All Patients (n=45)</u></b>      | <b>Patients without irAE (N=31)</b> | <b>Patients with irAE (N=14)</b> | <b>p-value</b> |
|----------------------------------------|-------------------------------------|----------------------------------|----------------|
| <b>Age, median</b>                     | 66.9                                | 67.4                             | 0.78           |
| <b>Sex, male/female</b>                | 13/13                               | 12/2                             | 0.03           |
| <b>never/light-smokers (&lt;10 py)</b> | 0                                   | 0                                |                |
| <b>pack-years, mean</b>                | 41.5                                | 47.5                             | 0.23           |
| <b>ECOG PS 0 / 1, number</b>           | 13 / 11                             | 9 / 5                            | 0.5            |
| <b>PD-L1 TPS, mean</b>                 | 38.1                                | 33.4                             | 0.95           |
| <b>NLR, mean</b>                       | 7.0                                 | 5.6                              | 0.45           |

Abbreviations: irAE: immune-related adverse events; ECOG PS: ECOG performance status; NLR: neutrophil-to-lymphocyte ratio.

**Supplementary Table 2: Description of irAEs, their severity and management**

| <b>Affected organs</b> | <b>Patients (N)</b> | <b>Grade <math>\geq 3</math> (N)</b> | <b>Steroids (N)</b> |
|------------------------|---------------------|--------------------------------------|---------------------|
| Pneumonitis            | 7                   | 6                                    | 7                   |
| Dermatitis             | 1                   | 0                                    | 0                   |
| Endocrinological       | 4                   | 1                                    | 2                   |
| Hepatitis              | 2                   | 1                                    | 2                   |

### Supplementary Table 3: Univariable 12-week landmark analysis of progression-free and overall survival according to occurrence of irAE in NSCLC

The association of irAE and other variables with progression-free (PFS) and overall survival (OS) was analyzed using a univariable Cox regression 12- landmark analysis. Statistically significant results have been highlighted in bold.

| <b>PFS with 12-week landmark</b> | <b>HR</b>   | <b>P-value</b>   | <b>95%-CI</b> |
|----------------------------------|-------------|------------------|---------------|
| IrAE occurrence                  | <b>0.68</b> | <b>0.004</b>     | 0.53-0.88     |
| PD-L1 TPS (<1, 1-49, 50+)        | <b>0.70</b> | <b>&lt;0.001</b> | 0.59-0.82     |
| NLR ( $\geq 5$ , <5)             | 1.20        | 1.20             | 0.95-1.51     |
| Treatment line                   | 1.11        | 0.09             | 0.98-1.26     |
| Treatment type <sup>1</sup>      | 1.16        | 0.26             | 0.90-1.51     |
| ECOG PS                          | 1.13        | 0.29             | 0.91-1.40     |
| <b>OS with 12-week landmark</b>  | <b>HR</b>   | <b>P-value</b>   | <b>95%-CI</b> |
| IrAE occurrence                  | <b>0.40</b> | <b>&lt;0.001</b> | 0.29-0.55     |
| PD-L1 TPS (<1, 1-49, 50+)        | <b>0.77</b> | <b>0.001</b>     | 0.66-0.89     |
| NLR ( $\geq 5$ , <5)             | 1.52        | <0.001           | 1.21-1.90     |
| Treatment line                   | <b>1.19</b> | <b>0.001</b>     | 1.07-1.33     |
| Treatment type <sup>1</sup>      | 0.75        | 0.06             | 0.56-1.01     |
| ECOG PS                          | <b>1.26</b> | <b>0.03</b>      | 1.03-1.55     |

**Abbreviations:** PFS: progression-free survival; OS: overall survival; HR: hazard ratio; 95% CI: 95% confidence interval; irAE: immune related adverse events; ECOG PS: Eastern Cooperative Oncology Group Performance Status; IO: immunotherapy; PD-L1 TPS: Programmed Death Ligand 1 Tumor Proportion Score (%); NLR: Neutrophil-to-Lymphocyte Ratio.

<sup>1</sup>chemoimmunotherapy vs. IO- monotherapy.

**Supplementary Table 4: Multivariable 12-week landmark analysis of progression-free and overall survival according to occurrence of irAE in NSCLC**

The association of irAE and other variables with progression-free (PFS) and overall survival (OS) was analyzed using a multivariable Cox regression 12-week landmark analysis. Statistically significant results have been highlighted in bold.

| <b>PFS with 12-week landmark</b> | <b>HR</b>   | <b>P-value</b>   | <b>95%-CI</b> |
|----------------------------------|-------------|------------------|---------------|
| IrAE occurrence                  | <b>0.68</b> | <b>0.009</b>     | 0.51-0.90     |
| PD-L1 TPS (<1, 1-49, 50+)        | <b>0.71</b> | <b>&lt;0.001</b> | 0.59-0.86     |
| NLR ( $\geq 5$ , <5)             | 1.05        | 0.73             | 0.80-1.34     |
| Treatment line                   | 1.14        | 0.12             | 0.97-1.33     |
| Treatment type <sup>1</sup>      | 0.98        | 0.91             | 0.70-1.40     |
| ECOG PS                          | 1.16        | 0.23             | 0.91-1.45     |
| <b>OS with 12-week landmark</b>  | <b>HR</b>   | <b>P-value</b>   | <b>95%-CI</b> |
| IrAE occurrence                  | <b>0.40</b> | <b>&lt;0.001</b> | 0.28-0.58     |
| PD-L1 TPS (<1, 1-49, 50+)        | <b>0.76</b> | <b>0.003</b>     | 0.64-0.91     |
| NLR ( $\geq 5$ , <5)             | <b>1.45</b> | <b>0.003</b>     | 1.13-1.86     |
| Treatment line                   | 1.13        | 0.08             | 0.99-1.30     |
| Treatment type <sup>1</sup>      | 0.71        | 0.07             | 0.49-1.03     |
| ECOG PS                          | <b>1.35</b> | <b>0.01</b>      | 1.07-1.71     |

Abbreviations: PFS: progression-free survival; OS: overall survival; HR: hazard ratio; 95% CI: 95% confidence interval; irAE: immune related adverse events; ECOG PS: Eastern Cooperative Oncology Group Performance Status; IO: immunotherapy; PD-L1 TPS: Programmed Death Ligand 1 Tumor Proportion Score (%); NLR: Neutrophil-to-Lymphocyte Ratio.

<sup>1</sup> chemoimmunotherapy vs. IO- monotherapy.

**Supplementary Table 5: Multivariable time-dependent Cox regression analysis of overall survival**

The association of irAE and other variables with overall survival (OS) was analyzed using a multivariable Cox regression with immune-related adverse events (irAE) as a time dependent co-variate. Included were all parameters used in the multivariable analysis of Table 4. Statistically significant results have been highlighted.

| <sup>1</sup> OS, multivariable analysis | HR          | P-value          | 95% CI           |
|-----------------------------------------|-------------|------------------|------------------|
| irAE                                    | <b>0.70</b> | <b>0.03</b>      | <b>0.51-0.97</b> |
| PD-L1 TPS (<1, 1-49, 50+)               | <b>0.77</b> | <b>&lt;0.001</b> | <b>0.66-0.89</b> |
| NLR ( $\geq 5$ , <5)                    | <b>1.91</b> | <b>&lt;0.001</b> | <b>1.55-2.37</b> |
| treatment line                          | <b>1.14</b> | <b>0.01</b>      | <b>1.03-1.27</b> |
| treatment type <sup>1</sup>             | <b>0.47</b> | <b>&lt;0.001</b> | <b>0.34-0.64</b> |
| ECOG PS                                 | <b>1.45</b> | <b>&lt;0.001</b> | <b>1.20-1.75</b> |

Abbreviations: PFS, progression-free survival; OS, overall survival, HR, hazard ratio; 95% CI: 95% confidence interval; irAE, immune-related adverse events; ECOG PS, Eastern Cooperative Oncology Group performance status; IO, immunotherapy; PD-L1 TPS, Programmed Death Ligand 1 Tumor Proportion Score (%); NLR: Neutrophil-to-Lymphocyte Ratio.

<sup>1</sup> chemoimmunotherapy vs. IO- monotherapy

**Supplementary Figure 1. Progression-free and overall survival by occurrence of irAE in a 12-week landmark analysis**

(A) The median progression-free survival under immunotherapy (PFS) was 9 months (95% confidence interval [CI] 8.1-10.4) for patients without immune-related adverse events (irAE) vs. 15 months (8.2-22.1, logrank p=0.003) for patients with irAE in a 12-week landmark analysis.

(B) The median overall survival from immunotherapy start (OS) was 14 months (12.4-15.6) for patients without irAE vs. 37 months (28.5-44.8, logrank p<0.001) for patients with irAE in a 12-week landmark analysis.

**Supplementary Figure 1**

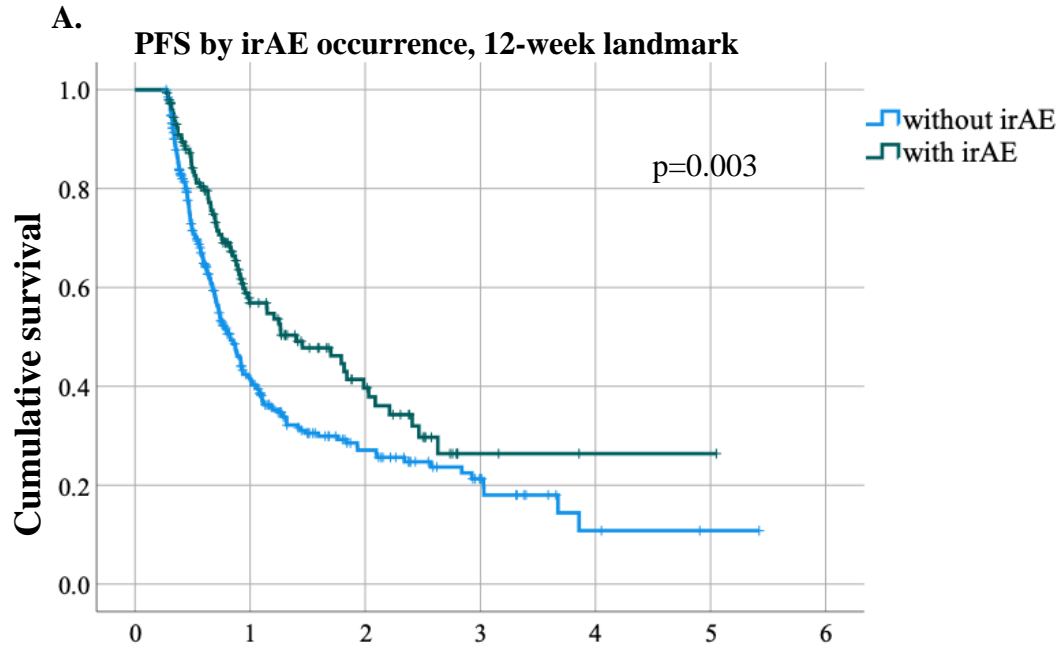

| No. at risk:  | PFS (years) |    |    |    |   |   |   |
|---------------|-------------|----|----|----|---|---|---|
|               | 0           | 1  | 2  | 3  | 4 | 5 | 6 |
| with irAE:    | 156         | 56 | 23 | 3  | 1 | 1 | 0 |
| without irAE: | 350         | 98 | 37 | 15 | 3 | 1 | 0 |

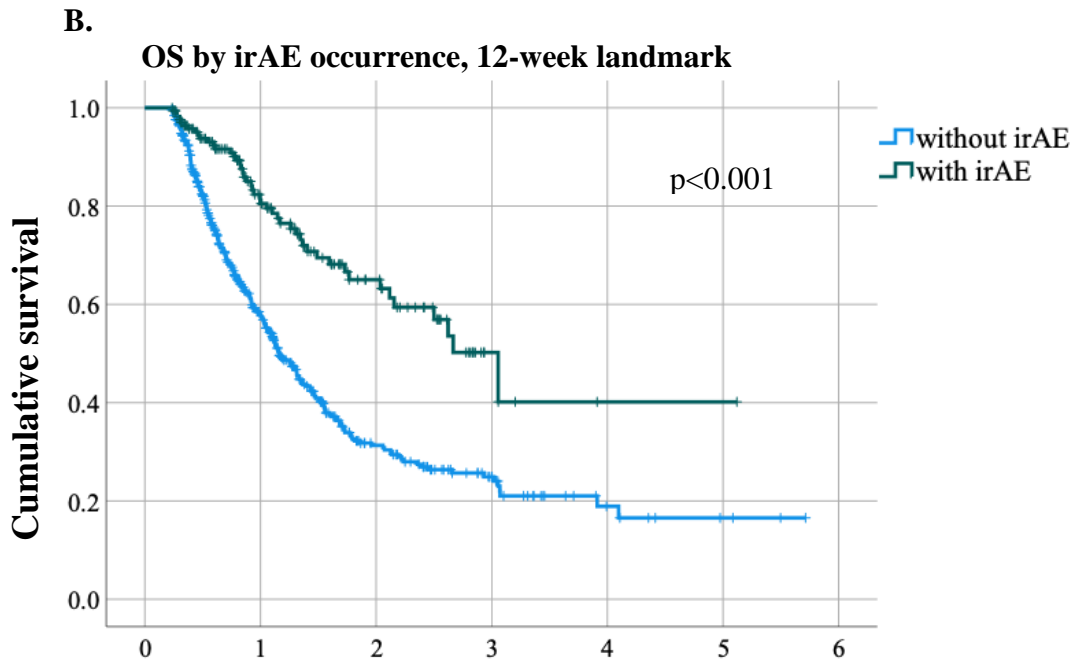

| No. at risk:  | OS (years) |     |    |    |   |   |   |
|---------------|------------|-----|----|----|---|---|---|
|               | 0          | 1   | 2  | 3  | 4 | 5 | 6 |
| with irAE:    | 171        | 86  | 36 | 5  | 1 | 1 | 0 |
| without irAE: | 503        | 208 | 66 | 28 | 7 | 3 | 0 |
